# Supplementary material
Source: Springer Nature journal article supplement (https://www.springermedizin.de/resource/supplementary/13030_2013_139_MOESM1_ESM.pdf/9644842)

**A** Tension-Anxiety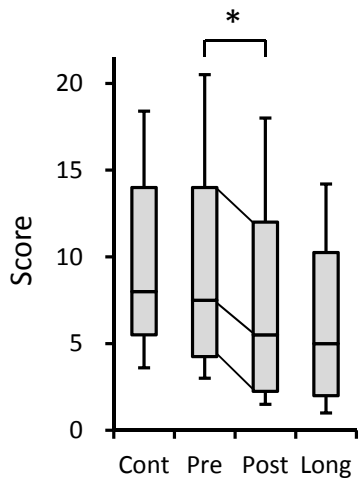**B** Depression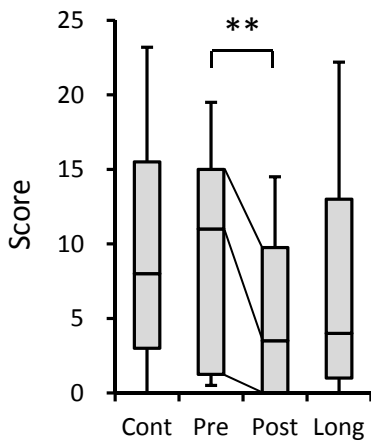**C** Anger-Hostility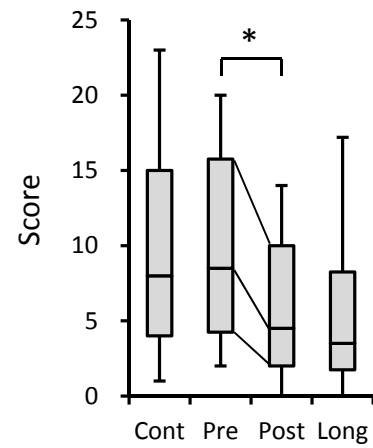**D** Vigor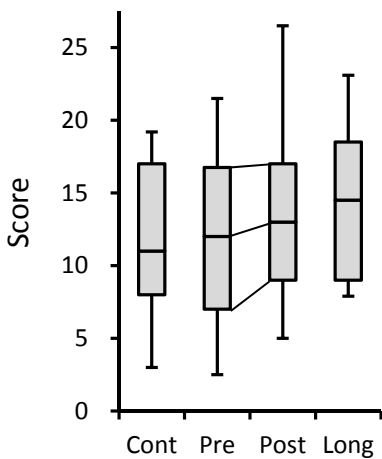**E** Fatigue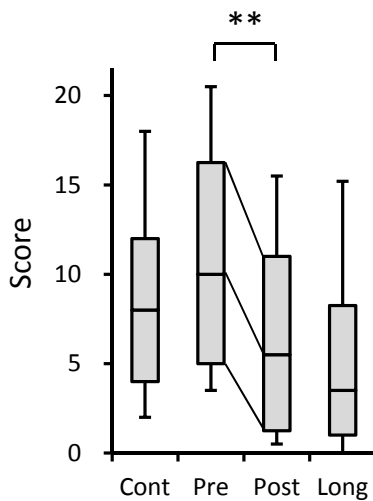**F** Confusion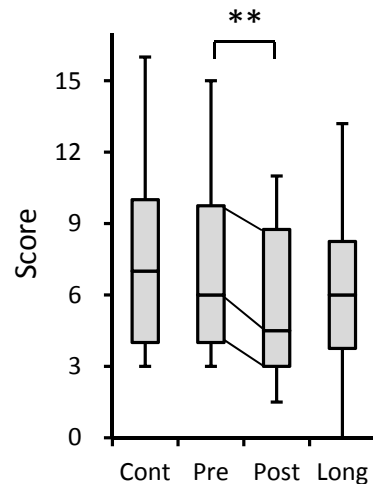

Supplement: MOESM1 [file 9644842]
